# Supplementary material for: Biomarker identification by reversing the learning mechanism of an autoencoder and recursive feature elimination
Source: Royal Society of Chemistry journal article supplement (doi:10.1039/d1mo00467k), 2022-05-12
Supplement: d1mo00467k1.pdf [file d1mo00467k1.pdf]

## A. Deleted genes

| Deleted Genes |            |            |            |            |            |
|---------------|------------|------------|------------|------------|------------|
| gene_5        | gene_23    | gene_4370  | gene_4808  | gene_4809  | gene_4814  |
| gene_4816     | gene_4817  | gene_4831  | gene_5288  | gene_7661  | gene_7662  |
| gene_7663     | gene_7664  | gene_7665  | gene_8121  | gene_9304  | gene_9306  |
| gene_9314     | gene_9316  | gene_9320  | gene_9452  | gene_10121 | gene_11958 |
| gene_13991    | gene_14158 | gene_14159 | gene_14161 | gene_15138 | gene_15140 |
| gene_15141    | gene_15446 | gene_16566 | gene_16568 | gene_16569 | gene_16571 |
| gene_16575    | gene_16578 | gene_16579 | gene_16604 | gene_16634 | gene_16637 |
| gene_16677    | gene_16697 | gene_16698 | gene_16699 | gene_16700 | gene_16701 |
| gene_16702    | gene_16704 | gene_16705 | gene_16706 | gene_16707 | gene_16708 |
| gene_16709    | gene_16710 | gene_16711 | gene_16712 | gene_16713 | gene_16714 |
| gene_16715    | gene_16716 | gene_16717 | gene_16718 | gene_16719 | gene_16720 |
| gene_16721    | gene_16722 | gene_16723 | gene_16724 | gene_16725 | gene_16726 |
| gene_16727    | gene_16728 | gene_16729 | gene_16730 | gene_16731 | gene_16732 |
| gene_16733    | gene_16734 | gene_16735 | gene_16736 | gene_16737 | gene_16738 |
| gene_16739    | gene_16740 | gene_16741 | gene_16742 | gene_16743 | gene_16744 |
| gene_16745    | gene_16746 | gene_16748 | gene_16749 | gene_16750 | gene_16751 |
| gene_16752    | gene_16753 | gene_16754 | gene_16756 | gene_16757 | gene_16758 |
| gene_16759    | gene_16760 | gene_16761 | gene_16762 | gene_16763 | gene_16764 |
| gene_16765    | gene_16766 | gene_16767 | gene_16768 | gene_16769 | gene_16770 |
| gene_16771    | gene_16772 | gene_16774 | gene_16775 | gene_16776 | gene_16777 |
| gene_16778    | gene_16779 | gene_16780 | gene_16781 | gene_16782 | gene_16783 |
| gene_16785    | gene_16787 | gene_16788 | gene_16789 | gene_16790 | gene_16791 |
| gene_16792    | gene_16794 | gene_16795 | gene_16796 | gene_16798 | gene_16799 |
| gene_16800    | gene_16801 | gene_16802 | gene_16803 | gene_16804 | gene_16805 |
| gene_16806    | gene_16807 | gene_16808 | gene_16809 | gene_16810 | gene_16811 |
| gene_16812    | gene_16813 | gene_16816 | gene_16818 | gene_16819 | gene_16820 |
| gene_16821    | gene_16822 | gene_16823 | gene_16824 | gene_16826 | gene_16827 |
| gene_16830    | gene_16831 | gene_16832 | gene_16833 | gene_16834 | gene_16835 |
| gene_16836    | gene_16837 | gene_16838 | gene_16839 | gene_16840 | gene_16841 |
| gene_16842    | gene_16843 | gene_16844 | gene_16845 | gene_16846 | gene_16847 |
| gene_16848    | gene_16849 | gene_16850 | gene_16851 | gene_16852 | gene_16853 |
| gene_16854    | gene_16855 | gene_16856 | gene_16857 | gene_16858 | gene_16859 |
| gene_16860    | gene_16861 | gene_16862 | gene_16863 | gene_16864 | gene_16865 |
| gene_16866    | gene_16867 | gene_16868 | gene_16869 | gene_16870 | gene_16871 |
| gene_16872    | gene_16873 | gene_16874 | gene_16875 | gene_16876 | gene_16877 |
| gene_16878    | gene_16879 | gene_16880 | gene_16881 | gene_16882 | gene_16883 |
| gene_16884    | gene_16885 | gene_16886 | gene_16888 | gene_16889 | gene_16890 |
| gene_16891    | gene_16892 | gene_16893 | gene_16894 | gene_16895 | gene_16896 |
| gene_16897    | gene_16898 | gene_16899 | gene_16900 | gene_16901 | gene_16902 |
| gene_16903    | gene_16904 | gene_16905 | gene_16906 | gene_16907 | gene_16908 |
| gene_16909    | gene_16910 | gene_16911 | gene_16914 | gene_16915 | gene_16916 |
| gene_16917    | gene_16918 | gene_16920 | gene_16921 | gene_16922 | gene_16924 |
| gene_16925    | gene_16926 | gene_18829 | gene_18902 | gene_18903 | gene_18908 |
| gene_18909    | gene_18910 | gene_18911 | gene_18914 | gene_18915 | gene_19450 |
| gene_19451    | gene_19452 | gene_19671 |            |            |            |
