# Supplementary material for: Biomarker identification by reversing the learning mechanism of an autoencoder and recursive feature elimination
Source: Royal Society of Chemistry journal article supplement (doi:10.1039/d1mo00467k), 2022-05-12
Supplement: d1mo00467k2.pdf [file d1mo00467k2.pdf]

| <b>BRCA_count,</b> | <b>BRCA_gene</b>                        |
|--------------------|-----------------------------------------|
| 291,               | ['gene_230']                            |
| 269,               | ['gene_232']                            |
| 263,               | ['gene_5380']                           |
| 261,               | ['gene_19035']                          |
| 260,               | ['gene_4041']                           |
| 252,               | ['gene_6566']                           |
| 236,               | ['gene_4053']                           |
| 225,               | ['gene_17077']                          |
| 220,               | ['gene_14218']                          |
| 191,               | ['gene_15300']                          |
| 185,               | ['gene_19652']                          |
| 184,               | ['gene_6857']                           |
| 182,               | ['gene_18392']                          |
| 179,               | ['gene_11422']                          |
| 177,               | ['gene_6698']                           |
| 173,               | ['gene_4042']                           |
| 168,               | ['gene_8146']                           |
| 162,               | ['gene_552']                            |
| 159,               | ['gene_15242']                          |
| 141,               | ['gene_8127']                           |
| 137,               | ['gene_3371']                           |
| 136,               | ['gene_1322']                           |
| 132,               | ['gene_7148']                           |
| 121,               | ['gene_7899']                           |
| 120,               | ['gene_10916']                          |
| 115,               | ['gene_18039']                          |
| 112,               | ['gene_13801']                          |
| 106,               | ['gene_19739']                          |
| 105,               | ['gene_7112']                           |
| 104,               | ['gene_9230']                           |
| 99,                | ['gene_16338' 'gene_6694']              |
| 94,                | ['gene_8128']                           |
| 92,                | ['gene_8131']                           |
| 91,                | ['gene_2505']                           |
| 87,                | ['gene_15314']                          |
| 86,                | ['gene_459']                            |
| 80,                | ['gene_289']                            |
| 79,                | ['gene_8137']                           |
| 78,                | ['gene_19375']                          |
| 66,                | ['gene_12851' 'gene_4066']              |
| 65,                | ['gene_7898']                           |
| 62,                | ['gene_10394' 'gene_1317']              |
| 60,                | ['gene_15254' 'gene_8324']              |
| 59,                | ['gene_15272' 'gene_7900']              |
| 58,                | ['gene_6215']                           |
| 57,                | ['gene_15225']                          |
| 56,                | ['gene_10503']                          |
| 53,                | ['gene_3932']                           |
| 52,                | ['gene_15589' 'gene_18570']             |
| 51,                | ['gene_15250' 'gene_4421']              |
| 49,                | ['gene_10194' 'gene_1200' 'gene_18949'] |
| 48,                | ['gene_9229']                           |
| 47,                | ['gene_15316' 'gene_8323']              |
| 46,                | ['gene_15229']                          |

45, ['gene\_15227']  
44, ['gene\_17257' 'gene\_18103']  
43, ['gene\_4897']  
42, ['gene\_15281' 'gene\_2914']  
41, ['gene\_7155']  
40, ['gene\_4419']  
39, ['gene\_15793']  
37, ['gene\_15204']  
36, ['gene\_3325' 'gene\_3629' 'gene\_4210']  
35, ['gene\_16344' 'gene\_905']  
34, ['gene\_878']  
32, ['gene\_13176']  
31, ['gene\_18388']  
30, ['gene\_12841' 'gene\_17738' 'gene\_3251']  
29, ['gene\_3929' 'gene\_4160']  
28, ['gene\_15245' 'gene\_15444' 'gene\_4401']  
27, ['gene\_17374']  
26, ['gene\_15244' 'gene\_15280' 'gene\_5234']  
25, ['gene\_18930' 'gene\_4143' 'gene\_5678']  
24, ['gene\_15284' 'gene\_322']  
23, ['gene\_439' 'gene\_6536' 'gene\_6976']  
22, ['gene\_15253' 'gene\_17155']  
21, ['gene\_11029' 'gene\_15273' 'gene\_15299' 'gene\_15576' 'gene\_3869']  
20, ['gene\_4033' 'gene\_5727' 'gene\_6535' 'gene\_6876' 'gene\_861']  
19, ['gene\_10407' 'gene\_15275' 'gene\_9254']  
18, ['gene\_11014' 'gene\_1507' 'gene\_15190' 'gene\_4790']  
17, ['gene\_34' 'gene\_3541' 'gene\_4061' 'gene\_5590']  
16, ['gene\_15197' 'gene\_17643']  
15, ['gene\_11358' 'gene\_14022' 'gene\_15216' 'gene\_15586' 'gene\_18403']  
['gene\_4474' 'gene\_6688' 'gene\_9226']  
13, ['gene\_12065' 'gene\_1502' 'gene\_17970' 'gene\_4054']  
12, ['gene\_13462' 'gene\_15188' 'gene\_15202' 'gene\_16414' 'gene\_16432']  
['gene\_228' 'gene\_2831' 'gene\_4397' 'gene\_4709' 'gene\_5542']  
['gene\_8143' 'gene\_9483']  
11, ['gene\_15199' 'gene\_15243' 'gene\_15287' 'gene\_17352' 'gene\_4564']  
['gene\_7971' 'gene\_8259' 'gene\_9267']  
10, ['gene\_15449' 'gene\_17645' 'gene\_17920' 'gene\_2504' 'gene\_2939']  
['gene\_4405' 'gene\_4911' 'gene\_6592']  
9, ['gene\_1348' 'gene\_15220' 'gene\_15636' 'gene\_17173' 'gene\_17219']  
['gene\_19034' 'gene\_7988' 'gene\_8266' 'gene\_8268']  
8, ['gene\_14276' 'gene\_15217' 'gene\_15237' 'gene\_15303' 'gene\_15792']  
['gene\_15949' 'gene\_1621' 'gene\_17230' 'gene\_5386' 'gene\_5455']  
['gene\_773' 'gene\_7912' 'gene\_8988' 'gene\_9419']  
7, ['gene\_1075' 'gene\_11432' 'gene\_11619' 'gene\_15189' 'gene\_15277']  
['gene\_2544' 'gene\_4299' 'gene\_5407' 'gene\_8197' 'gene\_8564']  
['gene\_9225']  
6, ['gene\_13382' 'gene\_14082' 'gene\_14484' 'gene\_15255' 'gene\_15434']  
['gene\_18158' 'gene\_18433' 'gene\_243' 'gene\_3306' 'gene\_3640']  
['gene\_4062' 'gene\_5432' 'gene\_5840' 'gene\_7034' 'gene\_9228']  
5, ['gene\_11070' 'gene\_11373' 'gene\_11379' 'gene\_11698' 'gene\_118']  
['gene\_11947' 'gene\_12749' 'gene\_12990' 'gene\_13498' 'gene\_13916']  
['gene\_15236' 'gene\_15247' 'gene\_17613' 'gene\_18746' 'gene\_19661']  
['gene\_2835' 'gene\_2958' 'gene\_3289' 'gene\_3443' 'gene\_3693']  
['gene\_4052' 'gene\_4240' 'gene\_4598' 'gene\_5297' 'gene\_5384']  
['gene\_5488' 'gene\_6790' 'gene\_9269']

4, ['gene\_10109' 'gene\_10521' 'gene\_10856' 'gene\_11353' 'gene\_11355']  
['gene\_11539' 'gene\_12182' 'gene\_12320' 'gene\_13413' 'gene\_14064']  
['gene\_14946' 'gene\_15297' 'gene\_15317' 'gene\_1554' 'gene\_15865']  
['gene\_1648' 'gene\_18038' 'gene\_18125' 'gene\_18538' 'gene\_18547']  
['gene\_18994' 'gene\_3288' 'gene\_3353' 'gene\_3692' 'gene\_4565']  
['gene\_5475' 'gene\_6031' 'gene\_6236' 'gene\_838' 'gene\_9421']

3, ['gene\_10406' 'gene\_10452' 'gene\_10522' 'gene\_10741' 'gene\_10943']  
['gene\_11425' 'gene\_11817' 'gene\_12006' 'gene\_12214' 'gene\_12750']  
['gene\_13243' 'gene\_13278' 'gene\_13302' 'gene\_14191' 'gene\_14347']  
['gene\_14384' 'gene\_15195' 'gene\_16340' 'gene\_16538' 'gene\_17076']  
['gene\_17274' 'gene\_17922' 'gene\_18501' 'gene\_18548' 'gene\_18793']  
['gene\_19020' 'gene\_3362' 'gene\_3540' 'gene\_4205' 'gene\_4248']  
['gene\_4534' 'gene\_4698' 'gene\_531' 'gene\_5381' 'gene\_5501']  
['gene\_5704' 'gene\_6451' 'gene\_6563' 'gene\_7218' 'gene\_7499']  
['gene\_7982' 'gene\_8254' 'gene\_8318' 'gene\_8721' 'gene\_9255']  
['gene\_9256' 'gene\_9275' 'gene\_9385' 'gene\_9484' 'gene\_9638']

2, ['gene\_10995' 'gene\_11356' 'gene\_11434' 'gene\_11561' 'gene\_11749']  
['gene\_11990' 'gene\_13179' 'gene\_13220' 'gene\_13327' 'gene\_13517']  
['gene\_13543' 'gene\_13574' 'gene\_13625' 'gene\_1381' 'gene\_13865']  
['gene\_13935' 'gene\_14035' 'gene\_14208' 'gene\_14473' 'gene\_14511']  
['gene\_14575' 'gene\_14923' 'gene\_15219' 'gene\_15224' 'gene\_15279']  
['gene\_15291' 'gene\_15437' 'gene\_15514' 'gene\_16097' 'gene\_16283']  
['gene\_16468' 'gene\_16929' 'gene\_17247' 'gene\_17362' 'gene\_17378']  
['gene\_17471' 'gene\_17472' 'gene\_17817' 'gene\_17971' 'gene\_18037']  
['gene\_18488' 'gene\_19734' 'gene\_2910' 'gene\_2949' 'gene\_3354']  
['gene\_3571' 'gene\_359' 'gene\_3647' 'gene\_3909' 'gene\_4064']  
['gene\_4167' 'gene\_4320' 'gene\_4347' 'gene\_4426' 'gene\_4436']  
['gene\_4553' 'gene\_5271' 'gene\_5695' 'gene\_6231' 'gene\_6339']  
['gene\_6405' 'gene\_6734' 'gene\_6803' 'gene\_7591' 'gene\_7606']  
['gene\_7607' 'gene\_761' 'gene\_7713' 'gene\_7717' 'gene\_8161']  
['gene\_8164' 'gene\_8234' 'gene\_8311' 'gene\_8604' 'gene\_8631']  
['gene\_8644' 'gene\_8649' 'gene\_9224' 'gene\_9227' 'gene\_9377']  
['gene\_955']

1, ['gene\_10203' 'gene\_10259' 'gene\_10263' 'gene\_1045' 'gene\_10502']  
['gene\_10549' 'gene\_10620' 'gene\_10719' 'gene\_10740' 'gene\_10773']  
['gene\_10991' 'gene\_11011' 'gene\_11033' 'gene\_11250' 'gene\_11252']  
['gene\_11388' 'gene\_11484' 'gene\_11575' 'gene\_11594' 'gene\_11595']  
['gene\_11737' 'gene\_1176' 'gene\_11850' 'gene\_11910' 'gene\_12070']  
['gene\_12091' 'gene\_1210' 'gene\_12100' 'gene\_12114' 'gene\_12166']  
['gene\_1224' 'gene\_12240' 'gene\_12311' 'gene\_1245' 'gene\_1272']  
['gene\_13011' 'gene\_13087' 'gene\_13105' 'gene\_13228' 'gene\_13328']  
['gene\_13354' 'gene\_13453' 'gene\_13628' 'gene\_13629' 'gene\_13898']  
['gene\_1397' 'gene\_14077' 'gene\_14120' 'gene\_14121' 'gene\_1420']  
['gene\_1423' 'gene\_14255' 'gene\_14348' 'gene\_14352' 'gene\_14396']  
['gene\_14400' 'gene\_14425' 'gene\_14545' 'gene\_14647' 'gene\_14652']  
['gene\_15198' 'gene\_15200' 'gene\_15231' 'gene\_15257' 'gene\_15274']  
['gene\_15285' 'gene\_15286' 'gene\_15298' 'gene\_15310' 'gene\_15319']  
['gene\_15336' 'gene\_15442' 'gene\_15448' 'gene\_15502' 'gene\_15588']  
['gene\_15643' 'gene\_15644' 'gene\_15711' 'gene\_15777' 'gene\_1579']  
['gene\_15867' 'gene\_15989' 'gene\_16258' 'gene\_1627' 'gene\_16419']  
['gene\_1650' 'gene\_1655' 'gene\_1675' 'gene\_1698' 'gene\_17010']  
['gene\_17031' 'gene\_17046' 'gene\_17336' 'gene\_17370' 'gene\_17407']  
['gene\_17425' 'gene\_17501' 'gene\_17510' 'gene\_17573' 'gene\_17699']  
['gene\_17784' 'gene\_17937' 'gene\_18003' 'gene\_18056' 'gene\_18084']  
['gene\_18088' 'gene\_18305' 'gene\_18325' 'gene\_18626' 'gene\_18652']

['gene\_18729' 'gene\_18805' 'gene\_18929' 'gene\_19023' 'gene\_19036']  
['gene\_19072' 'gene\_19075' 'gene\_19130' 'gene\_19155' 'gene\_19157']  
['gene\_19267' 'gene\_19344' 'gene\_19347' 'gene\_19446' 'gene\_19479']  
['gene\_19503' 'gene\_19643' 'gene\_19656' 'gene\_19735' 'gene\_19914']  
['gene\_20033' 'gene\_2007' 'gene\_20320' 'gene\_2152' 'gene\_2277']  
['gene\_2313' 'gene\_2324' 'gene\_2530' 'gene\_272' 'gene\_2731']  
['gene\_2879' 'gene\_2898' 'gene\_2906' 'gene\_2908' 'gene\_2982']  
['gene\_3307' 'gene\_3415' 'gene\_3522' 'gene\_3618' 'gene\_3699']  
['gene\_3743' 'gene\_3774' 'gene\_389' 'gene\_4031' 'gene\_4055']  
['gene\_4065' 'gene\_4089' 'gene\_4092' 'gene\_4162' 'gene\_4169']  
['gene\_4247' 'gene\_428' 'gene\_4317' 'gene\_4319' 'gene\_4356']  
['gene\_4387' 'gene\_4393' 'gene\_444' 'gene\_4441' 'gene\_4473']  
['gene\_4567' 'gene\_4748' 'gene\_4757' 'gene\_4934' 'gene\_5003']  
['gene\_5022' 'gene\_511' 'gene\_5215' 'gene\_5230' 'gene\_5496']  
['gene\_5521' 'gene\_5546' 'gene\_5568' 'gene\_5580' 'gene\_5662']  
['gene\_5762' 'gene\_5836' 'gene\_585' 'gene\_623' 'gene\_6232']  
['gene\_6235' 'gene\_6369' 'gene\_6452' 'gene\_6589' 'gene\_6933']  
['gene\_6947' 'gene\_6949' 'gene\_7273' 'gene\_7379' 'gene\_7397']  
['gene\_747' 'gene\_7501' 'gene\_7504' 'gene\_7572' 'gene\_7592']  
['gene\_7597' 'gene\_769' 'gene\_7731' 'gene\_778' 'gene\_7893']  
['gene\_7913' 'gene\_8149' 'gene\_8154' 'gene\_8163' 'gene\_8326']  
['gene\_8334' 'gene\_8444' 'gene\_862' 'gene\_8628' 'gene\_8671']  
['gene\_8722' 'gene\_8913' 'gene\_914' 'gene\_9142' 'gene\_9169']  
['gene\_9172' 'gene\_9180' 'gene\_9222' 'gene\_9231' 'gene\_9361']  
['gene\_9391' 'gene\_9407' 'gene\_9527']

| <b>KIRC_count,</b> | <b>KIRC_gene</b>                        |
|--------------------|-----------------------------------------|
| 144,               | ['gene_6857']                           |
| 143,               | ['gene_19035']                          |
| 142,               | ['gene_19375']                          |
| 137,               | ['gene_230' 'gene_6698']                |
| 135,               | ['gene_5380']                           |
| 131,               | ['gene_7899']                           |
| 129,               | ['gene_17077' 'gene_3371']              |
| 126,               | ['gene_552']                            |
| 119,               | ['gene_9483']                           |
| 104,               | ['gene_15242']                          |
| 101,               | ['gene_11422']                          |
| 100,               | ['gene_6566']                           |
| 98,                | ['gene_14218' 'gene_5590']              |
| 92,                | ['gene_17173']                          |
| 84,                | ['gene_11698']                          |
| 82,                | ['gene_1322' 'gene_34']                 |
| 79,                | ['gene_15792']                          |
| 76,                | ['gene_18392' 'gene_18570']             |
| 74,                | ['gene_7900']                           |
| 73,                | ['gene_7898' 'gene_8326']               |
| 71,                | ['gene_2505']                           |
| 70,                | ['gene_14923' 'gene_15272' 'gene_4421'] |
| 67,                | ['gene_7396']                           |
| 66,                | ['gene_4419']                           |
| 61,                | ['gene_2504']                           |
| 60,                | ['gene_18039']                          |
| 58,                | ['gene_11713']                          |
| 56,                | ['gene_7155' 'gene_8131']               |
| 54,                | ['gene_4054']                           |
| 47,                | ['gene_3932']                           |
| 46,                | ['gene_232' 'gene_7912']                |
| 45,                | ['gene_8322']                           |
| 43,                | ['gene_17937' 'gene_8664']              |
| 41,                | ['gene_6694']                           |
| 40,                | ['gene_15314' 'gene_19357' 'gene_8146'] |
| 39,                | ['gene_661']                            |
| 38,                | ['gene_3251']                           |
| 35,                | ['gene_5271']                           |
| 34,                | ['gene_13302']                          |
| 33,                | ['gene_19153' 'gene_885']               |
| 32,                | ['gene_1621' 'gene_8323']               |
| 30,                | ['gene_8324']                           |
| 29,                | ['gene_2914']                           |
| 28,                | ['gene_3325']                           |
| 27,                | ['gene_19464']                          |
| 26,                | ['gene_13498' 'gene_1502']              |
| 25,                | ['gene_5620']                           |
| 24,                | ['gene_2831' 'gene_2939']               |
| 21,                | ['gene_18388' 'gene_289']               |
| 20,                | ['gene_15245' 'gene_18476']             |
| 17,                | ['gene_1200' 'gene_16088' 'gene_228']   |
| 16,                | ['gene_4053' 'gene_459']                |
| 15,                | ['gene_12841' 'gene_4041' 'gene_6417']  |
| 14,                | ['gene_15204' 'gene_7148']              |

13, ['gene\_15281' 'gene\_16998']  
12, ['gene\_10194' 'gene\_19034' 'gene\_5432' 'gene\_878']  
11, ['gene\_13613' 'gene\_4274']  
10, ['gene\_134' 'gene\_15316' 'gene\_17947' 'gene\_6592']  
9, ['gene\_13185' 'gene\_15227' 'gene\_15300' 'gene\_19151' 'gene\_4205']  
['gene\_6688' 'gene\_862']  
8, ['gene\_13413' 'gene\_15217' 'gene\_15814' 'gene\_16342' 'gene\_17076']  
['gene\_17292' 'gene\_4055' 'gene\_441' 'gene\_4442' 'gene\_838']  
7, ['gene\_15250' 'gene\_15254' 'gene\_15275' 'gene\_16132' 'gene\_18103']  
['gene\_5455' 'gene\_6370' 'gene\_8137' 'gene\_9119']  
6, ['gene\_13222' 'gene\_15190' 'gene\_15197' 'gene\_15277']  
5, ['gene\_11749' 'gene\_14766' 'gene\_15243' 'gene\_15247' 'gene\_17219']  
['gene\_4474' 'gene\_535' 'gene\_761' 'gene\_7905' 'gene\_8128']  
['gene\_8163']  
4, ['gene\_13640' 'gene\_15220' 'gene\_15237' 'gene\_15244' 'gene\_15284']  
['gene\_2152' 'gene\_6369' 'gene\_6733' 'gene\_6884' 'gene\_6931']  
['gene\_7265' 'gene\_773' 'gene\_8628' 'gene\_8721']  
3, ['gene\_12091' 'gene\_12304' 'gene\_14834' 'gene\_15280' 'gene\_15444']  
['gene\_17930' 'gene\_18762' 'gene\_18930' 'gene\_19885' 'gene\_2151']  
['gene\_5430' 'gene\_5599' 'gene\_6535' 'gene\_6543' 'gene\_7273']  
['gene\_7490' 'gene\_7591' 'gene\_871' 'gene\_9528']  
2, ['gene\_10209' 'gene\_10266' 'gene\_10844' 'gene\_10943' 'gene\_11014']  
['gene\_11279' 'gene\_1204' 'gene\_12045' 'gene\_12061' 'gene\_14651']  
['gene\_14942' 'gene\_1507' 'gene\_15189' 'gene\_15286' 'gene\_15287']  
['gene\_15317' 'gene\_17257' 'gene\_17562' 'gene\_17645' 'gene\_18003']  
['gene\_18037' 'gene\_18217' 'gene\_18595' 'gene\_19344' 'gene\_19661']  
['gene\_19739' 'gene\_2811' 'gene\_3366' 'gene\_3472' 'gene\_3619']  
['gene\_4167' 'gene\_4401' 'gene\_491' 'gene\_5386' 'gene\_6410']  
['gene\_6589' 'gene\_7112' 'gene\_7655' 'gene\_775' 'gene\_7913']  
['gene\_7916' 'gene\_8063' 'gene\_8320' 'gene\_8643' 'gene\_865']  
['gene\_9540']  
1, ['gene\_10394' 'gene\_10407' 'gene\_1075' 'gene\_10916' 'gene\_11249']  
['gene\_11271' 'gene\_11409' 'gene\_11434' 'gene\_11947' 'gene\_11965']  
['gene\_12006' 'gene\_1219' 'gene\_1247' 'gene\_1250' 'gene\_12745']  
['gene\_12903' 'gene\_13109' 'gene\_132' 'gene\_13215' 'gene\_13482']  
['gene\_13574' 'gene\_13898' 'gene\_14121' 'gene\_14322' 'gene\_14422']  
['gene\_14822' 'gene\_14950' 'gene\_15186' 'gene\_15188' 'gene\_15199']  
['gene\_15202' 'gene\_15216' 'gene\_15225' 'gene\_15229' 'gene\_15236']  
['gene\_15253' 'gene\_15283' 'gene\_15291' 'gene\_15297' 'gene\_15299']  
['gene\_15315' 'gene\_15460' 'gene\_15461' 'gene\_15581' 'gene\_15643']  
['gene\_15753' 'gene\_15755' 'gene\_15812' 'gene\_16372' 'gene\_16397']  
['gene\_16402' 'gene\_16474' 'gene\_1680' 'gene\_1685' 'gene\_17170']  
['gene\_17207' 'gene\_18044' 'gene\_18158' 'gene\_18433' 'gene\_18900']  
['gene\_18949' 'gene\_19220' 'gene\_19343' 'gene\_19449' 'gene\_19577']  
['gene\_19868' 'gene\_200' 'gene\_213' 'gene\_2711' 'gene\_2835']  
['gene\_3019' 'gene\_3258' 'gene\_3306' 'gene\_3353' 'gene\_3388']  
['gene\_3439' 'gene\_3618' 'gene\_3629' 'gene\_3638' 'gene\_3645']  
['gene\_3803' 'gene\_3843' 'gene\_3958' 'gene\_4065' 'gene\_4066']  
['gene\_4273' 'gene\_4340' 'gene\_4356' 'gene\_4425' 'gene\_4426']  
['gene\_4433' 'gene\_4482' 'gene\_4528' 'gene\_4748' 'gene\_4837']  
['gene\_531' 'gene\_5376' 'gene\_5388' 'gene\_5746' 'gene\_5836']  
['gene\_6031' 'gene\_611' 'gene\_6442' 'gene\_6677' 'gene\_6827']  
['gene\_6935' 'gene\_7189' 'gene\_7218' 'gene\_7462' 'gene\_7499']  
['gene\_7611' 'gene\_7785' 'gene\_7914' 'gene\_7954' 'gene\_8061']  
['gene\_8070' 'gene\_8097' 'gene\_8127' 'gene\_8143' 'gene\_8154']

```
['gene_8318' 'gene_8334' 'gene_841' 'gene_842' 'gene_8433']  
['gene_8518' 'gene_855' 'gene_857' 'gene_858' 'gene_859']  
['gene_864' 'gene_8802' 'gene_9201' 'gene_9229' 'gene_9230']  
['gene_9267' 'gene_9390' 'gene_9393' 'gene_9406' 'gene_9627']
```

| <b>LUAD_count,</b> | <b>LUAD_gene</b>                                                  |
|--------------------|-------------------------------------------------------------------|
| 138,               | ['gene_230']                                                      |
| 131,               | ['gene_6698']                                                     |
| 119,               | ['gene_232']                                                      |
| 111,               | ['gene_18392']                                                    |
| 109,               | ['gene_289']                                                      |
| 104,               | ['gene_6566']                                                     |
| 100,               | ['gene_3371']                                                     |
| 97,                | ['gene_19035']                                                    |
| 94,                | ['gene_15896']                                                    |
| 92,                | ['gene_5380']                                                     |
| 91,                | ['gene_10194']                                                    |
| 89,                | ['gene_14218']                                                    |
| 83,                | ['gene_15444']                                                    |
| 78,                | ['gene_16283']                                                    |
| 76,                | ['gene_11422']                                                    |
| 75,                | ['gene_4421']                                                     |
| 74,                | ['gene_7899']                                                     |
| 72,                | ['gene_3541']                                                     |
| 71,                | ['gene_7900']                                                     |
| 68,                | ['gene_15242']                                                    |
| 66,                | ['gene_6694' 'gene_6857']                                         |
| 64,                | ['gene_1322' 'gene_552']                                          |
| 63,                | ['gene_17077']                                                    |
| 59,                | ['gene_4053']                                                     |
| 58,                | ['gene_4041']                                                     |
| 57,                | ['gene_15300']                                                    |
| 54,                | ['gene_15272' 'gene_5590']                                        |
| 52,                | ['gene_7912']                                                     |
| 51,                | ['gene_15898' 'gene_15899']                                       |
| 47,                | ['gene_18570']                                                    |
| 45,                | ['gene_4419']                                                     |
| 44,                | ['gene_7112']                                                     |
| 42,                | ['gene_17643']                                                    |
| 40,                | ['gene_8128']                                                     |
| 38,                | ['gene_18388']                                                    |
| 36,                | ['gene_34' 'gene_7898' 'gene_8131']                               |
| 33,                | ['gene_10218' 'gene_11355']                                       |
| 32,                | ['gene_13639']                                                    |
| 31,                | ['gene_11550' 'gene_3540']                                        |
| 30,                | ['gene_15314' 'gene_8146']                                        |
| 29,                | ['gene_15250' 'gene_17173']                                       |
| 26,                | ['gene_12851' 'gene_13176' 'gene_13298' 'gene_13413']             |
| 25,                | ['gene_1200' 'gene_19739' 'gene_8127']                            |
| 24,                | ['gene_2914']                                                     |
| 22,                | ['gene_12841' 'gene_15281' 'gene_15591' 'gene_7155']              |
| 21,                | ['gene_15204' 'gene_15316' 'gene_838']                            |
| 20,                | ['gene_9267']                                                     |
| 19,                | ['gene_15253' 'gene_15792' 'gene_15897' 'gene_2504']              |
| 18,                | ['gene_15254' 'gene_17257' 'gene_19375']                          |
| 17,                | ['gene_773']                                                      |
| 16,                | ['gene_9229' 'gene_9483']                                         |
| 14,                | ['gene_11249' 'gene_15229' 'gene_15299']                          |
| 13,                | ['gene_18998' 'gene_4897' 'gene_6369' 'gene_6410' 'gene_8143']    |
| 12,                | ['gene_10407' 'gene_15227' 'gene_15284' 'gene_17155' 'gene_9230'] |



11, ['gene\_15245' 'gene\_7148']  
10, ['gene\_15236' 'gene\_4422' 'gene\_8137' 'gene\_8334' 'gene\_887']  
9, ['gene\_11352' 'gene\_15225' 'gene\_15449' 'gene\_18039' 'gene\_18949']  
['gene\_19652' 'gene\_2939' 'gene\_7591' 'gene\_8324']  
8, ['gene\_13498' 'gene\_3618' 'gene\_4042' 'gene\_439' 'gene\_885']  
['gene\_905']  
7, ['gene\_11029' 'gene\_12290' 'gene\_15188' 'gene\_15237' 'gene\_15244']  
['gene\_17219' 'gene\_18930' 'gene\_4054' 'gene\_7913']  
6, ['gene\_11432' 'gene\_15190' 'gene\_15275' 'gene\_15277' 'gene\_15303']  
['gene\_15590' 'gene\_1621' 'gene\_17510' 'gene\_19577' 'gene\_2895']  
['gene\_2906' 'gene\_4066' 'gene\_4169' 'gene\_4187' 'gene\_4205']  
['gene\_4210' 'gene\_513' 'gene\_6215' 'gene\_6535' 'gene\_9394']  
['gene\_9484']  
5, ['gene\_10452' 'gene\_11798' 'gene\_12870' 'gene\_13574' 'gene\_15224']  
['gene\_15273' 'gene\_15279' 'gene\_15643' 'gene\_17145' 'gene\_17292']  
['gene\_17925' 'gene\_17937' 'gene\_18103' 'gene\_3354' 'gene\_3692']  
['gene\_3932' 'gene\_4405' 'gene\_5455' 'gene\_6370' 'gene\_8321']  
['gene\_9255']  
4, ['gene\_12029' 'gene\_14022' 'gene\_14473' 'gene\_15197' 'gene\_15220']  
['gene\_15243' 'gene\_15287' 'gene\_17947' 'gene\_18403' 'gene\_243']  
['gene\_3034' 'gene\_3629' 'gene\_3640' 'gene\_3929' 'gene\_4172']  
['gene\_4790' 'gene\_514' 'gene\_7504' 'gene\_7914' 'gene\_7998']  
['gene\_9638']  
3, ['gene\_10741' 'gene\_10844' 'gene\_11250' 'gene\_1204' 'gene\_1317']  
['gene\_13179' 'gene\_13243' 'gene\_13543' 'gene\_13569' 'gene\_13632']  
['gene\_13801' 'gene\_13866' 'gene\_15021' 'gene\_15189' 'gene\_15202']  
['gene\_15232' 'gene\_15280' 'gene\_15317' 'gene\_15336' 'gene\_15453']  
['gene\_15617' 'gene\_15777' 'gene\_16474' 'gene\_18805' 'gene\_2277']  
['gene\_353' 'gene\_3693' 'gene\_4167' 'gene\_4252' 'gene\_4401']  
['gene\_4425' 'gene\_4474' 'gene\_5234' 'gene\_638' 'gene\_7058']  
['gene\_7218' 'gene\_8049' 'gene\_8259' 'gene\_8323' 'gene\_878']  
['gene\_9467']  
2, ['gene\_1038' 'gene\_10394' 'gene\_1104' 'gene\_11252' 'gene\_11411']  
['gene\_11425' 'gene\_11698' 'gene\_12045' 'gene\_12070' 'gene\_12091']  
['gene\_12173' 'gene\_1224' 'gene\_12750' 'gene\_13299' 'gene\_1348']  
['gene\_1420' 'gene\_14946' 'gene\_15199' 'gene\_15216' 'gene\_15247']  
['gene\_15442' 'gene\_15580' 'gene\_1579' 'gene\_16258' 'gene\_17920']  
['gene\_17970' 'gene\_18158' 'gene\_19593' 'gene\_2324' 'gene\_2506']  
['gene\_2964' 'gene\_491' 'gene\_510' 'gene\_5271' 'gene\_5384']  
['gene\_5386' 'gene\_542' 'gene\_5432' 'gene\_66' 'gene\_6761']  
['gene\_7189' 'gene\_7265' 'gene\_7273' 'gene\_7285' 'gene\_769']  
['gene\_7971' 'gene\_8318' 'gene\_8628' 'gene\_864' 'gene\_8875']  
['gene\_9228' 'gene\_9232' 'gene\_9254' 'gene\_9419' 'gene\_9527']  
1, ['gene\_10227' 'gene\_10521' 'gene\_10918' 'gene\_11011' 'gene\_11019']  
['gene\_11350' 'gene\_11356' 'gene\_11372' 'gene\_11619' 'gene\_11706']  
['gene\_11749' 'gene\_118' 'gene\_11903' 'gene\_1191' 'gene\_11990']  
['gene\_12000' 'gene\_12009' 'gene\_12069' 'gene\_1210' 'gene\_12769']  
['gene\_12903' 'gene\_12946' 'gene\_13105' 'gene\_13106' 'gene\_13177']  
['gene\_13228' 'gene\_13278' 'gene\_13302' 'gene\_13545' 'gene\_13759']  
['gene\_1397' 'gene\_14115' 'gene\_14170' 'gene\_14220' 'gene\_1431']  
['gene\_14351' 'gene\_14566' 'gene\_14823' 'gene\_1502' 'gene\_15036']  
['gene\_15217' 'gene\_15221' 'gene\_15235' 'gene\_15271' 'gene\_15285']  
['gene\_15286' 'gene\_15298' 'gene\_15433' 'gene\_15448' 'gene\_15514']  
['gene\_15531' 'gene\_15583' 'gene\_15618' 'gene\_15647' 'gene\_15704']  
['gene\_15793' 'gene\_15806' 'gene\_15894' 'gene\_1592' 'gene\_15978']

['gene\_16029' 'gene\_16088' 'gene\_16228' 'gene\_16338' 'gene\_16344']  
['gene\_17147' 'gene\_17183' 'gene\_17184' 'gene\_17263' 'gene\_17378']  
['gene\_17414' 'gene\_17486' 'gene\_17582' 'gene\_17613' 'gene\_17658']  
['gene\_17914' 'gene\_17922' 'gene\_17930' 'gene\_18037' 'gene\_18056']  
['gene\_18091' 'gene\_18117' 'gene\_18538' 'gene\_18595' 'gene\_1874']  
['gene\_18762' 'gene\_18793' 'gene\_18810' 'gene\_18929' 'gene\_18994']  
['gene\_19023' 'gene\_19034' 'gene\_19118' 'gene\_19127' 'gene\_19468']  
['gene\_19885' 'gene\_1992' 'gene\_2143' 'gene\_2152' 'gene\_2167']  
['gene\_2505' 'gene\_2949' 'gene\_3019' 'gene\_3251' 'gene\_3288']  
['gene\_3292' 'gene\_3306' 'gene\_3325' 'gene\_3353' 'gene\_3360']  
['gene\_3365' 'gene\_3366' 'gene\_349' 'gene\_3669' 'gene\_3691']  
['gene\_3797' 'gene\_3843' 'gene\_3845' 'gene\_4065' 'gene\_4162']  
['gene\_4221' 'gene\_4264' 'gene\_4345' 'gene\_4347' 'gene\_441']  
['gene\_4448' 'gene\_447' 'gene\_4556' 'gene\_4589' 'gene\_459']  
['gene\_4804' 'gene\_492' 'gene\_5003' 'gene\_5017' 'gene\_515']  
['gene\_5157' 'gene\_5229' 'gene\_535' 'gene\_543' 'gene\_5430']  
['gene\_5456' 'gene\_5475' 'gene\_5632' 'gene\_5649' 'gene\_5678']  
['gene\_5807' 'gene\_6160' 'gene\_6442' 'gene\_6589' 'gene\_6592']  
['gene\_6714' 'gene\_6734' 'gene\_6852' 'gene\_6870' 'gene\_6931']  
['gene\_7396' 'gene\_7484' 'gene\_7489' 'gene\_761' 'gene\_766']  
['gene\_7713' 'gene\_7937' 'gene\_8063' 'gene\_8161' 'gene\_8197']  
['gene\_8217' 'gene\_8266' 'gene\_8268' 'gene\_8322' 'gene\_8522']  
['gene\_862' 'gene\_8664' 'gene\_8665' 'gene\_8673' 'gene\_8722']  
['gene\_888' 'gene\_889' 'gene\_9224' 'gene\_9225' 'gene\_9269']  
['gene\_9275' 'gene\_9397' 'gene\_9399' 'gene\_9645']

| <b>PRAD_count,</b> | <b>PRAD_gene</b>                                                  |
|--------------------|-------------------------------------------------------------------|
| 136,               | ['gene_9176']                                                     |
| 134,               | ['gene_5380']                                                     |
| 130,               | ['gene_9175']                                                     |
| 128,               | ['gene_15314']                                                    |
| 123,               | ['gene_15242']                                                    |
| 115,               | ['gene_230']                                                      |
| 109,               | ['gene_14218']                                                    |
| 108,               | ['gene_203']                                                      |
| 107,               | ['gene_15300']                                                    |
| 93,                | ['gene_11409']                                                    |
| 89,                | ['gene_11910']                                                    |
| 87,                | ['gene_12851' 'gene_16358']                                       |
| 85,                | ['gene_15316']                                                    |
| 83,                | ['gene_15250']                                                    |
| 81,                | ['gene_6215']                                                     |
| 78,                | ['gene_15272']                                                    |
| 77,                | ['gene_232']                                                      |
| 76,                | ['gene_228' 'gene_7155']                                          |
| 74,                | ['gene_6698']                                                     |
| 71,                | ['gene_8131']                                                     |
| 69,                | ['gene_15197' 'gene_15254']                                       |
| 67,                | ['gene_15236' 'gene_17645']                                       |
| 63,                | ['gene_15204']                                                    |
| 62,                | ['gene_18381']                                                    |
| 61,                | ['gene_11698' 'gene_7218']                                        |
| 60,                | ['gene_15244']                                                    |
| 59,                | ['gene_11422' 'gene_1322']                                        |
| 49,                | ['gene_15253']                                                    |
| 47,                | ['gene_17170']                                                    |
| 46,                | ['gene_13190']                                                    |
| 45,                | ['gene_11250']                                                    |
| 42,                | ['gene_12841' 'gene_4866']                                        |
| 41,                | ['gene_15245' 'gene_19035']                                       |
| 38,                | ['gene_1200' 'gene_15281']                                        |
| 36,                | ['gene_12995']                                                    |
| 35,                | ['gene_12069' 'gene_15202' 'gene_233' 'gene_8127']                |
| 34,                | ['gene_15229']                                                    |
| 31,                | ['gene_15189']                                                    |
| 30,                | ['gene_4897']                                                     |
| 29,                | ['gene_13517' 'gene_1420']                                        |
| 28,                | ['gene_7899']                                                     |
| 27,                | ['gene_2914']                                                     |
| 26,                | ['gene_8014']                                                     |
| 25,                | ['gene_15284' 'gene_8137']                                        |
| 24,                | ['gene_3371']                                                     |
| 23,                | ['gene_1317' 'gene_15188' 'gene_18392']                           |
| 22,                | ['gene_838']                                                      |
| 21,                | ['gene_14798']                                                    |
| 20,                | ['gene_10394' 'gene_15317' 'gene_552' 'gene_6536']                |
| 19,                | ['gene_15299' 'gene_15303' 'gene_537']                            |
| 18,                | ['gene_15225' 'gene_17257' 'gene_17664' 'gene_17949' 'gene_5432'] |
|                    | ['gene_7900']                                                     |
| 17,                | ['gene_11432' 'gene_15227' 'gene_15243']                          |
| 16,                | ['gene_11434' 'gene_15287' 'gene_16228' 'gene_34']                |

15, ['gene\_6857' 'gene\_9229']  
14, ['gene\_15199' 'gene\_4918' 'gene\_5271' 'gene\_5388']  
13, ['gene\_13176' 'gene\_17077' 'gene\_18546' 'gene\_2939']  
12, ['gene\_89']  
11, ['gene\_7148']  
10, ['gene\_4167' 'gene\_6592' 'gene\_761' 'gene\_905']  
9, ['gene\_118' 'gene\_12214' 'gene\_15247' 'gene\_4340' 'gene\_609']  
['gene\_8146' 'gene\_9177']  
8, ['gene\_15220' 'gene\_17378' 'gene\_18745']  
7, ['gene\_13976' 'gene\_14220' 'gene\_19034' 'gene\_4053' 'gene\_9169']  
6, ['gene\_11762' 'gene\_12091' 'gene\_15273' 'gene\_15793' 'gene\_18476']  
['gene\_18570' 'gene\_19375' 'gene\_19739' 'gene\_289' 'gene\_7597']  
['gene\_8128' 'gene\_8721']  
5, ['gene\_11596' 'gene\_15190' 'gene\_17076' 'gene\_18039' 'gene\_18760']  
['gene\_19652' 'gene\_585' 'gene\_6535' 'gene\_6584' 'gene\_8988']  
4, ['gene\_11420' 'gene\_12290' 'gene\_15255' 'gene\_15277' 'gene\_15280']  
['gene\_16539' 'gene\_3691' 'gene\_3845' 'gene\_4033' 'gene\_4073']  
['gene\_4247' 'gene\_439' 'gene\_6566' 'gene\_6688' 'gene\_7083']  
['gene\_7898' 'gene\_8324']  
3, ['gene\_10194' 'gene\_10703' 'gene\_11575' 'gene\_11749' 'gene\_12320']  
['gene\_13298' 'gene\_13658' 'gene\_15237' 'gene\_15275' 'gene\_15576']  
['gene\_1621' 'gene\_17376' 'gene\_17613' 'gene\_19145' 'gene\_19885']  
['gene\_2505' 'gene\_4041' 'gene\_4421' 'gene\_5590' 'gene\_9254']  
2, ['gene\_10916' 'gene\_11426' 'gene\_12745' 'gene\_13382' 'gene\_15195']  
['gene\_15198' 'gene\_15217' 'gene\_15235' 'gene\_15743' 'gene\_15777']  
['gene\_16354' 'gene\_17010' 'gene\_17947' 'gene\_18135' 'gene\_19369']  
['gene\_2928' 'gene\_3376' 'gene\_3803' 'gene\_3973' 'gene\_4042']  
['gene\_4553' 'gene\_459' 'gene\_535' 'gene\_5752' 'gene\_5819']  
['gene\_6231' 'gene\_6593' 'gene\_7234' 'gene\_7971' 'gene\_8143']  
1, ['gene\_11758' 'gene\_12030' 'gene\_12749' 'gene\_13291' 'gene\_13413']  
['gene\_13801' 'gene\_13833' 'gene\_13898' 'gene\_13916' 'gene\_13950']  
['gene\_14213' 'gene\_14276' 'gene\_14400' 'gene\_15007' 'gene\_15186']  
['gene\_15246' 'gene\_15274' 'gene\_15514' 'gene\_15548' 'gene\_15742']  
['gene\_15786' 'gene\_15915' 'gene\_16309' 'gene\_16338' 'gene\_16372']  
['gene\_16398' 'gene\_1650' 'gene\_17292' 'gene\_17314' 'gene\_17471']  
['gene\_17561' 'gene\_17582' 'gene\_18327' 'gene\_18462' 'gene\_18538']  
['gene\_18545' 'gene\_18942' 'gene\_2007' 'gene\_213' 'gene\_263']  
['gene\_2901' 'gene\_3473' 'gene\_3629' 'gene\_3929' 'gene\_3932']  
['gene\_3958' 'gene\_4054' 'gene\_4066' 'gene\_4221' 'gene\_4397']  
['gene\_447' 'gene\_4645' 'gene\_4805' 'gene\_5297' 'gene\_5381']  
['gene\_5384' 'gene\_5488' 'gene\_5620' 'gene\_5678' 'gene\_5748']  
['gene\_6417' 'gene\_6563' 'gene\_6931' 'gene\_7484' 'gene\_7713']  
['gene\_8152' 'gene\_8259' 'gene\_8268' 'gene\_8318' 'gene\_8604']  
['gene\_864' 'gene\_9173' 'gene\_9224' 'gene\_9638']

| COAD_count, | COAD_gene                                                                                                                             |
|-------------|---------------------------------------------------------------------------------------------------------------------------------------|
| 75,         | ['gene_18392' 'gene_230']                                                                                                             |
| 73,         | ['gene_5380']                                                                                                                         |
| 72,         | ['gene_232']                                                                                                                          |
| 69,         | ['gene_3540']                                                                                                                         |
| 67,         | ['gene_15242']                                                                                                                        |
| 65,         | ['gene_15314']                                                                                                                        |
| 64,         | ['gene_15300']                                                                                                                        |
| 62,         | ['gene_6857']                                                                                                                         |
| 61,         | ['gene_6698']                                                                                                                         |
| 59,         | ['gene_552']                                                                                                                          |
| 56,         | ['gene_15272' 'gene_8146']                                                                                                            |
| 50,         | ['gene_15444']                                                                                                                        |
| 49,         | ['gene_11422']                                                                                                                        |
| 45,         | ['gene_15229' 'gene_19739']                                                                                                           |
| 44,         | ['gene_13413' 'gene_15250']                                                                                                           |
| 43,         | ['gene_18570' 'gene_19035']                                                                                                           |
| 42,         | ['gene_1200']                                                                                                                         |
| 41,         | ['gene_15245']                                                                                                                        |
| 40,         | ['gene_4041' 'gene_9229']                                                                                                             |
| 39,         | ['gene_1322' 'gene_4053' 'gene_7899']                                                                                                 |
| 38,         | ['gene_7155' 'gene_8131']                                                                                                             |
| 37,         | ['gene_8127']                                                                                                                         |
| 36,         | ['gene_15281' 'gene_8128']                                                                                                            |
| 35,         | ['gene_3541']                                                                                                                         |
| 34,         | ['gene_15254']                                                                                                                        |
| 29,         | ['gene_15197' 'gene_5829']                                                                                                            |
| 27,         | ['gene_15244']                                                                                                                        |
| 26,         | ['gene_12320' 'gene_15202' 'gene_15236' 'gene_15316']                                                                                 |
| 25,         | ['gene_15253' 'gene_17937']                                                                                                           |
| 23,         | ['gene_15299' 'gene_2914']                                                                                                            |
| 21,         | ['gene_15225']                                                                                                                        |
| 20,         | ['gene_12851' 'gene_1621' 'gene_289' 'gene_3371' 'gene_5590']<br>['gene_7900']                                                        |
| 19,         | ['gene_17077' 'gene_3325' 'gene_3640' 'gene_9483']                                                                                    |
| 18,         | ['gene_14218' 'gene_15227']                                                                                                           |
| 17,         | ['gene_15204' 'gene_243']                                                                                                             |
| 16,         | ['gene_6566']                                                                                                                         |
| 15,         | ['gene_18388' 'gene_9528']                                                                                                            |
| 14,         | ['gene_15188' 'gene_4042' 'gene_6694' 'gene_7971']                                                                                    |
| 13,         | ['gene_15280' 'gene_15284' 'gene_7148']                                                                                               |
| 12,         | ['gene_10452' 'gene_11353' 'gene_11355' 'gene_9467']                                                                                  |
| 11,         | ['gene_15189' 'gene_15224' 'gene_15243' 'gene_19373' 'gene_773']<br>['gene_8318' 'gene_9232']                                         |
| 10,         | ['gene_14823' 'gene_15275' 'gene_16228' 'gene_18930' 'gene_439']                                                                      |
| 9,          | ['gene_15190' 'gene_15317' 'gene_19734']                                                                                              |
| 8,          | ['gene_10194' 'gene_11411' 'gene_19034']                                                                                              |
| 7,          | ['gene_11619' 'gene_14819' 'gene_15247' 'gene_15273' 'gene_15303']<br>['gene_3354' 'gene_7898' 'gene_8137' 'gene_8161']               |
| 6,          | ['gene_13517' 'gene_14818' 'gene_15220' 'gene_15792' 'gene_3845']<br>['gene_4805' 'gene_7395' 'gene_9275']                            |
| 5,          | ['gene_13278' 'gene_14449' 'gene_15277' 'gene_15336' 'gene_17257']<br>['gene_5747' 'gene_8665' 'gene_878' 'gene_9465' 'gene_9529']    |
| 4,          | ['gene_11029' 'gene_11409' 'gene_11432' 'gene_1272' 'gene_14946']<br>['gene_15199' 'gene_17645' 'gene_18949' 'gene_3813' 'gene_5017'] |

['gene\_5386' 'gene\_5475' 'gene\_6314' 'gene\_6535' 'gene\_7912']  
['gene\_8268']  
3, ['gene\_11434' 'gene\_14347' 'gene\_15198' 'gene\_15297' 'gene\_15576']  
['gene\_17920' 'gene\_18810' 'gene\_19020' 'gene\_228' 'gene\_233']  
['gene\_3542' 'gene\_4419' 'gene\_4421' 'gene\_4804' 'gene\_4866']  
['gene\_5519' 'gene\_7591' 'gene\_9230']  
2, ['gene\_1133' 'gene\_12009' 'gene\_13176' 'gene\_13916' 'gene\_13976']  
['gene\_15255' 'gene\_15283' 'gene\_16227' 'gene\_17036' 'gene\_17147']  
['gene\_17173' 'gene\_17922' 'gene\_17929' 'gene\_18476' 'gene\_18546']  
['gene\_19503' 'gene\_34' 'gene\_3443' 'gene\_3619' 'gene\_3843']  
['gene\_3973' 'gene\_4340' 'gene\_4401' 'gene\_5388' 'gene\_5432']  
['gene\_6222' 'gene\_761' 'gene\_7965' 'gene\_8259' 'gene\_8323']  
1, ['gene\_10109' 'gene\_11222' 'gene\_11439' 'gene\_11452' 'gene\_11780']  
['gene\_11798' 'gene\_11990' 'gene\_11999' 'gene\_12045' 'gene\_12091']  
['gene\_13243' 'gene\_13552' 'gene\_13574' 'gene\_13847' 'gene\_14026']  
['gene\_14276' 'gene\_14473' 'gene\_14644' 'gene\_14821' 'gene\_15216']  
['gene\_15217' 'gene\_15219' 'gene\_15232' 'gene\_15285' 'gene\_15286']  
['gene\_15287' 'gene\_15711' 'gene\_15793' 'gene\_16233' 'gene\_16258']  
['gene\_1648' 'gene\_17076' 'gene\_17817' 'gene\_18403' 'gene\_18471']  
['gene\_19023' 'gene\_19036' 'gene\_19661' 'gene\_19702' 'gene\_2504']  
['gene\_2834' 'gene\_2844' 'gene\_2896' 'gene\_2901' 'gene\_2939']  
['gene\_3691' 'gene\_3692' 'gene\_3803' 'gene\_4054' 'gene\_4187']  
['gene\_4405' 'gene\_5384' 'gene\_5455' 'gene\_5500' 'gene\_5678']  
['gene\_6592' 'gene\_7112' 'gene\_7218' 'gene\_7238' 'gene\_766']  
['gene\_7914' 'gene\_8143' 'gene\_8240' 'gene\_8266' 'gene\_8324']  
['gene\_838' 'gene\_8722' 'gene\_9074']
