# Supplementary material for: Biomarker identification by reversing the learning mechanism of an autoencoder and recursive feature elimination
Source: Royal Society of Chemistry journal article supplement (doi:10.1039/d1mo00467k), 2022-05-12
Supplement: d1mo00467k3.pdf [file d1mo00467k3.pdf]

**Table 1: Autoencoder architecture for independent datasets**

| <b>Dataset</b> | <b># genes</b> | <b># non-zero genes</b> | <b># perceptrons in each layer of Autoencoder</b> |
|----------------|----------------|-------------------------|---------------------------------------------------|
| TCGA-5         | 60478          | 58462                   | 58462 - 720 - 60 - 720 - 58462                    |
| Melanoma-B     | 23686          | 22831                   | 22831 - 250 - 21 - 250 - 22831                    |
| Breast-B       | 57820          | 35148                   | 35148 - 480 - 35 - 480 - 35148                    |
| Colorectal-B   | 34127          | 34127                   | 34127 - 480 - 35 - 480 - 34127                    |
| BrPr-CTC       | 58347          | 53008                   | 53008 - 720 - 60 - 720 - 53008                    |
| Breast-M       | 22656          | 22656                   | 22656 - 250 - 21 - 250 - 22656                    |

**Table 2: Potential biomarkers for independent datasets**

| Dataset      | Biomarker                                                                                                                                                                                                                                                                                                                                                                                                                                                                                                                                                                                                                                                                                                                                                                                                                                                                                                                         |
|--------------|-----------------------------------------------------------------------------------------------------------------------------------------------------------------------------------------------------------------------------------------------------------------------------------------------------------------------------------------------------------------------------------------------------------------------------------------------------------------------------------------------------------------------------------------------------------------------------------------------------------------------------------------------------------------------------------------------------------------------------------------------------------------------------------------------------------------------------------------------------------------------------------------------------------------------------------|
| TCGA-5       | ENSG00000160862.11, ENSG00000189377.7, ENSG00000176153.11, ENSG00000159182.4, ENSG00000171747.7, ENSG00000157765.10, ENSG00000111341.8, ENSG00000146674.13, ENSG00000164825.3, ENSG00000130176.6, ENSG00000026025.12, ENSG00000094755.15, ENSG00000120885.18, ENSG00000158715.5, ENSG00000109846.6, ENSG00000143387.11, ENSG00000170323.7, ENSG00000158710.13, ENSG00000087086.12, ENSG00000105388.13, ENSG00000140988.14, ENSG00000084207.14, ENSG00000143320.7, ENSG00000272398.4, ENSG00000133392.15, ENSG00000168542.11, ENSG00000113140.9, ENSG00000086548.8, ENSG00000130513.6, ENSG00000134352.18, ENSG00000244468.1, ENSG00000142515.13, ENSG00000211895.4, ENSG00000197747.7, ENSG00000163191.5, ENSG00000096384.18, ENSG00000171858.16, ENSG00000187837.3, ENSG00000112306.7, ENSG00000111716.11, ENSG00000075624.12, ENSG00000118785.12, ENSG00000122026.9, ENSG00000115414.17, ENSG00000100097.10                     |
| Melanoma-B   | TMSB4X, CD8A, S100B, RPS12, MTRNR2L8, MTRNR2L2, SERPINE2, EEF1A1, RPS5, RPLP1, TYR, ACTB, SERPINA3, GNB2L1, PMEL                                                                                                                                                                                                                                                                                                                                                                                                                                                                                                                                                                                                                                                                                                                                                                                                                  |
| Breast-B     | 'ENSG00000019582.10', 'ENSG00000075624.9', 'ENSG00000108298.5', 'ENSG00000111341.5', 'ENSG00000111669.10', 'ENSG00000112096.12', 'ENSG00000113140.6', 'ENSG00000133048.8', 'ENSG00000133110.10', 'ENSG00000134333.9', 'ENSG00000137673.4', 'ENSG00000140105.13', 'ENSG00000143185.3', 'ENSG00000156234.7', 'ENSG00000157601.9', 'ENSG00000158869.6', 'ENSG00000161016.11', 'ENSG00000164919.6', 'ENSG00000166710.13', 'ENSG00000167996.11', 'ENSG00000189403.10', 'ENSG00000197956.5', 'ENSG00000198886.2', 'ENSG00000198899.2', 'ENSG00000198938.2', 'ENSG00000205542.6', 'ENSG00000213639.5', 'ENSG00000215066.3', 'ENSG00000222414.1', 'ENSG00000229117.4', 'ENSG00000251562.3', 'ENSG00000106819.7', 'ENSG00000110848.4', 'ENSG00000212907.2', 'ENSG00000102265.7', 'ENSG00000198727.2', 'ENSG00000175898.4', 'ENSG00000143933.12', 'ENSG00000272379.1', 'ENSG00000173812.6', 'ENSG00000228253.1', 'ENSG00000198888.2'        |
| Colorectal-B | A_23_P120660, A_33_P3234641, A_33_P3241582, A_23_P251593, A_23_P26713, A_33_P3375668, A_33_P3370461, A_23_P116694, A_33_P3587376, A_33_P3270852, A_23_P402751, A_33_P3296852, A_33_P3231005, A_33_P3336696, A_23_P356484, A_33_P3396434, A_33_P3315763, A_33_P3388491, A_32_P24581, A_24_P763243, A_33_P3293164, A_23_P26294                                                                                                                                                                                                                                                                                                                                                                                                                                                                                                                                                                                                      |
| BrPr-CTC     | 'ENSG00000067066_SP100', 'ENSG00000075624_ACTB', 'ENSG00000080824_HSP90AA1', 'ENSG00000087086_FTL', 'ENSG00000087460_GNAS', 'ENSG00000092841_MYL6', 'ENSG00000106541_AGR2', 'ENSG00000110484_SCGB2A2', 'ENSG00000111341_MGP', 'ENSG00000112306_RPS12', 'ENSG00000115648_MLPH', 'ENSG00000120885_CLU', 'ENSG00000130066_SAT1', 'ENSG00000132475_H3F3B', 'ENSG00000140988_RPS2', 'ENSG00000142515_KLK3', 'ENSG00000142676_RPL11', 'ENSG00000145425_RPS3A', 'ENSG00000149273_RPS3', 'ENSG00000156508_EEF1A1', 'ENSG00000163359_COL6A3', 'ENSG00000164266_SPINK1', 'ENSG00000167751_KLK2', 'ENSG00000167996_FTH1', 'ENSG00000168028_RPSA', 'ENSG00000171345_KRT19', 'ENSG00000182774_RPS17', 'ENSG00000196531_NACA', 'ENSG00000197956_S100A6', 'ENSG00000198763_MT-ND2', 'ENSG00000198938_MT-CO3', 'ENSG00000205542_TMSB4X', 'ENSG00000209082_MT-TL1', 'ENSG00000234741_GAS5', 'ENSG00000280614_FP236383', 'ENSG00000281383_FP671120' |
| Breast-M     | 19203, 1297, 20762, 18587, 12576, 20811, 11865, 5728, 9056, 16112, 3618, 2633, 17035, 6645, 21755, 14128, 9378, 11377, 16909, 5254, 987, 6450, 5506, 12742, 18540, 11308, 17056, 6817, 13312, 1470, 1806                                                                                                                                                                                                                                                                                                                                                                                                                                                                                                                                                                                                                                                                                                                          |

**Table 3: Cancer-specific potential biomarkers for TCGA-5 dataset with binary classification performance**

| <b>Class</b> | <b># BM</b> | <b>Biomarkers</b>                                                                                                                                                                                                                                                                                                                                                                                                                           | <b>Acc. (%)</b> |
|--------------|-------------|---------------------------------------------------------------------------------------------------------------------------------------------------------------------------------------------------------------------------------------------------------------------------------------------------------------------------------------------------------------------------------------------------------------------------------------------|-----------------|
| BRCA         | 20          | 'ENSG00000110484.6', 'ENSG00000172551.9', 'ENSG00000153002.10', 'ENSG00000181617.5', 'ENSG00000124935.3', 'ENSG00000143556.7', 'ENSG00000111341.8', 'ENSG00000189058.7', 'ENSG00000164692.16', 'ENSG00000211895.4', 'ENSG00000163220.10', 'ENSG00000108821.12', 'ENSG00000163191.5', 'ENSG00000075624.12', 'ENSG00000198840.2', 'ENSG00000198763.3', 'ENSG00000184009.8', 'ENSG00000160862.11', 'ENSG00000142541.15', 'ENSG00000087086.12'  | 95.46           |
| COAD         | 17          | 'ENSG00000169344.14', 'ENSG00000212907.2', 'ENSG00000198886.2', 'ENSG00000198712.1', 'ENSG00000198727.2', 'ENSG00000118785.12', 'ENSG00000198888.2', 'ENSG00000198786.2', 'ENSG00000198695.2', 'ENSG0000019582.13', 'ENSG00000234745.8', 'ENSG00000228253.1', 'ENSG00000198763.3', 'ENSG00000198840.2', 'ENSG00000211895.4', 'ENSG00000211592.5', 'ENSG00000034510.5'                                                                       | 92.52           |
| KIRC         | 20          | 'ENSG00000122852.13', 'ENSG00000168878.15', 'ENSG00000163220.10', 'ENSG00000164265.7', 'ENSG00000118785.12', 'ENSG00000185303.14', 'ENSG00000168542.11', 'ENSG00000198183.10', 'ENSG00000161055.3', 'ENSG00000184009.8', 'ENSG00000211598.2', 'ENSG0000019582.13', 'ENSG00000096088.15', 'ENSG00000163191.5', 'ENSG00000111640.13', 'ENSG00000198804.2', 'ENSG00000198727.2', 'ENSG00000198886.2', 'ENSG00000198712.1', 'ENSG00000198938.2' | 97.91           |
| LUAD         | 18          | 'ENSG00000163017.12', 'ENSG00000188257.9', 'ENSG00000087086.12', 'ENSG00000198840.2', 'ENSG00000142515.13', 'ENSG00000263639.4', 'ENSG00000014257.14', 'ENSG00000198938.2', 'ENSG00000198727.2', 'ENSG00000198804.2', 'ENSG00000198886.2', 'ENSG00000122585.6', 'ENSG00000210082.2', 'ENSG00000158715.5', 'ENSG00000198695.2', 'ENSG00000198786.2', 'ENSG00000142541.15', 'ENSG00000198899.2'                                               | 88.92           |
| PRAD         | 20          | 'ENSG00000197956.8', 'ENSG00000211890.3', 'ENSG00000111640.13', 'ENSG00000142541.15', 'ENSG00000034510.5', 'ENSG00000274012.1', 'ENSG00000198763.3', 'ENSG00000198727.2', 'ENSG00000228253.1', 'ENSG00000198886.2', 'ENSG00000198804.2', 'ENSG00000198840.2', 'ENSG00000184009.8', 'ENSG00000198899.2', 'ENSG00000198938.2', 'ENSG00000198786.2', 'ENSG00000210082.2', 'ENSG00000211459.2', 'ENSG00000102837.6', 'ENSG00000205542.9'        | 97.56           |

Here, # BM and Acc. stands for No. of Biomarkers and Accuracy, respectively.

**Table 4: Sub-optimal feature set for Primary UCI-5 dataset (17 features in each set)**

| <b>Sub-optimal Feature set</b> | <b>Features</b>                                                                                                                                                                                                                         | <b>Acc.±st.dev (%)</b> |
|--------------------------------|-----------------------------------------------------------------------------------------------------------------------------------------------------------------------------------------------------------------------------------------|------------------------|
| <b>#1</b>                      | 'gene_17643', 'gene_8326', 'gene_10916', 'gene_6698', 'gene_18381', 'gene_16358', 'gene_18570', 'gene_15896', 'gene_228', 'gene_19375', 'gene_1322', 'gene_13801', 'gene_11910', 'gene_17173', 'gene_17170', 'gene_12851', 'gene_18392' | 99.67±0.05             |
| <b>#2</b>                      | 'gene_19739', 'gene_16338', 'gene_9483', 'gene_19035', 'gene_13190', 'gene_7112', 'gene_7148', 'gene_17077', 'gene_4066', 'gene_5590', 'gene_9229', 'gene_4041', 'gene_1200', 'gene_8131', 'gene_17645', 'gene_4419', 'gene_18039'      | 95.03±0.12             |
| <b>#3</b>                      | 'gene_6857', 'gene_15229', 'gene_15236', 'gene_8128', 'gene_15444', 'gene_14218', 'gene_459', 'gene_11422', 'gene_15314', 'gene_15316', 'gene_552', 'gene_18388', 'gene_34', 'gene_203', 'gene_4042', 'gene_8137', 'gene_7898'          | 94.62±0.11             |
| <b>#4</b>                      | 'gene_232', 'gene_15202', 'gene_15272', 'gene_15242', 'gene_15300', 'gene_4421', 'gene_15197', 'gene_7218', 'gene_15281', 'gene_5380', 'gene_8127', 'gene_8146', 'gene_15254', 'gene_15253', 'gene_6694', 'gene_230', 'gene_15250'      | 82.99±0.17             |

Here, Acc. and st.dev stands for Accuracy and Standard Deviation, respectively.

Queries to create TCGA-5 dataset from <https://portal.gdc.cancer.gov/repository>.

Clear Gender IS female AND Disease Type IS ductal and lobular neoplasms AND  
Primary Site IS breast AND Program Name IS TCGA AND  
Project Id IS TCGA-BRCA AND Access IS open AND  
Workflow Type IS HTSeq - Counts AND Data Category IS transcriptome profiling AND  
Data Format IS txt AND Data Type IS Gene Expression Quantification AND  
Experimental Strategy IS RNA-Seq

Advanced Search

Clear Disease Type IS adenomas and adenocarcinomas AND Primary Site IS colon AND  
Program Name IS TCGA AND Project Id IS TCGA-COAD AND  
Workflow Type IS HTSeq - Counts AND Data Category IS transcriptome profiling AND  
Data Type IS Gene Expression Quantification AND Experimental Strategy IS RNA-Seq

Advanced Search

Clear Disease Type IS adenomas and adenocarcinomas AND Primary Site IS kidney AND  
Program Name IS TCGA AND Project Id IS TCGA-KIRC AND  
Workflow Type IS HTSeq - Counts AND Data Category IS transcriptome profiling AND  
Data Type IS Gene Expression Quantification AND Experimental Strategy IS RNA-Seq

Advanced Search

Clear Disease Type IS adenomas and adenocarcinomas AND  
Primary Site IS bronchus and lung AND Program Name IS TCGA AND  
Project Id IS TCGA-LUAD AND Workflow Type IS HTSeq - Counts AND  
Data Category IS transcriptome profiling AND Data Type IS Gene Expression Quantification AND  
Experimental Strategy IS RNA-Seq

Advanced Search

Clear Disease Type IS adenomas and adenocarcinomas AND  
Primary Site IS prostate gland AND Program Name IS TCGA AND  
Project Id IS TCGA-PRAD AND Workflow Type IS HTSeq - Counts AND  
Data Category IS transcriptome profiling AND Data Type IS Gene Expression Quantification AND  
Experimental Strategy IS RNA-Seq

Advanced Search

Query Date: 18 February 2022.

**Remark:** Though we have created three datasets using *HTSeq-Counts*, *HTSeq-FPKM* and *HTSeq-FPKM-UQ*, replacing *HTSeq-Counts* from the queries above, we have only used *HTSeq-FPKM* dataset in our analysis.

**Example Query (for BRCA):** [LINK](#) (Created 18 April 2022)
